# Supplementary material for: Does the Use of Peripheral Immune-Related Markers Indicate Whether to Administer Pazopanib, Trabectedin, or Eribulin to Advanced Soft Tissue Sarcoma Patients?
Source: MDPI journal article supplement (doi:10.3390/jcm10214972), 2021-10-26
Supplement: s1 [file s1]

**Supplementary Table S1.** Overlapping of the administration of eribulin, pazopanib, and trabectedin.

| Group       | Overlapping                                 | <i>n</i>    |
|-------------|---------------------------------------------|-------------|
| Eribulin    | Eribulin only                               | 18 (48.7 %) |
|             | Followed by either pazopanib or trabectedin | 12 (32.4 %) |
|             | Followed by both pazopanib and trabectedin  | 7 (18.9 %)  |
| Pazopanib   | Pazopanib only                              | 8 (47.1 %)  |
|             | Followed by either eribulin or trabectedin  | 5 (29.4 %)  |
|             | Followed by both eribulin and trabectedin   | 4 (23.5 %)  |
| Trabectedin | Trabectedin only                            | 1 (11.1 %)  |
|             | Followed by either eribulin or pazopanib    | 4 (44.4 %)  |
|             | Followed by both eribulin and pazopanib     | 4 (44.4 %)  |

**Supplementary Table S2.** Histological subtypes of soft tissue sarcomas.

|                                  | Eribulin<br>( <i>n</i> = 37) | Pazopanib<br>( <i>n</i> = 17) | Trabectedin<br>( <i>n</i> = 9) |
|----------------------------------|------------------------------|-------------------------------|--------------------------------|
| Dedifferentiated liposarcoma     | 15 (40.5%)                   | 2 (11.8 %)                    | 1 (11.1 %)                     |
| Leiomyosarcoma                   | 9 (24.3 %)                   | 1 (5.9 %)                     | 2 (22.2 %)                     |
| UPS                              | 7 (18.9 %)                   | 2 (11.8 %)                    | 0 (0.0 %)                      |
| Synovial sarcoma                 | 3 (8.1 %)                    | 2 (11.8 %)                    | 1 (11.1 %)                     |
| Myxofibrosarcoma                 | 1 (2.7 %)                    | 1 (5.9 %)                     | 1 (11.1 %)                     |
| MPNST                            | 1 (2.7 %)                    | 1 (5.9 %)                     | 0 (0.0 %)                      |
| Unclassified sarcoma             | 1 (2.7 %)                    | 2 (11.8 %)                    | 0 (0.0 %)                      |
| Angiosarcoma                     | 0 (0.0 %)                    | 2 (11.8 %)                    | 0 (0.0 %)                      |
| Malignant solitary fibrous tumor | 0 (0.0 %)                    | 2 (11.8 %)                    | 0 (0.0 %)                      |
| Adult fibrosarcoma               | 0 (0.0 %)                    | 1 (5.9 %)                     | 0 (0.0 %)                      |
| EMCS                             | 0 (0.0 %)                    | 1 (5.9 %)                     | 0 (0.0 %)                      |
| Myxoid liposarcoma               | 0 (0.0 %)                    | 0 (0.0 %)                     | 3 (33.3 %)                     |
| Extraskeletal Osteosarcoma       | 0 (0.0 %)                    | 0 (0.0 %)                     | 1 (11.1 %)                     |

UPS, Undifferentiated pleomorphic sarcoma. MPNST, Malignant peripheral nerve sheath tumor. EMCS, Extraskeletal myxoid chondrosarcoma.

**Supplementary Table S3.** Univariate analyses of the baseline factors for PFS.

| Parameter                    |                                  | HR (95% CI)      | <i>p</i> -value |
|------------------------------|----------------------------------|------------------|-----------------|
| Age                          | ≥ 65 (vs. < 65)                  | 0.62 (0.36–1.09) | 0.10            |
| Gender                       | Male (vs. Female)                | 0.86 (0.49–1.50) | 0.59            |
| Histology                    | L-sarcoma<br>(vs. non-L-sarcoma) | 0.65 (0.37–1.15) | 0.14            |
| Primary lesion               | Extremities<br>(vs. others)      | 0.83 (0.45–1.55) | 0.56            |
| Resection                    | Yes (vs. No)                     | 0.99 (0.54–1.82) | 0.98            |
| ECOG PS                      | 0 (vs. ≥ 1)                      | 0.87 (0.39–1.94) | 0.87            |
| Previous doxorubicin         | Yes (vs. No)                     | 1.17 (0.62–2.22) | 0.62            |
| Previous ifosfamide          | Yes (vs. No)                     | 1.17 (0.67–2.05) | 0.58            |
| No. of previous chemotherapy | 0–1 (vs. ≥ 2)                    | 0.60 (0.32–1.12) | 0.11            |
| Radiotherapy                 | Yes (vs. No)                     | 1.14 (0.65–1.98) | 0.65            |
| Carbon-ion radiotherapy      | Yes (vs. No)                     | 0.88 (0.41–1.87) | 0.73            |
| First drug                   | Eribulin<br>(vs. others)         | 0.61 (0.34–1.07) | 0.084           |
|                              | Pazopanib<br>(vs. others)        | 1.38 (0.76–2.53) | 0.29            |
|                              | Trabectedin<br>(vs. others)      | 1.67 (0.75–3.76) | 0.21            |
| ALC                          | Low (vs. High)                   | 1.04 (0.56–1.90) | 0.91            |
| NLR                          | Low (vs. High)                   | 1.06 (0.59–1.89) | 0.85            |
| PLR                          | Low (vs. High)                   | 1.14 (0.64–2.04) | 0.65            |
| LMR                          | Low (vs. High)                   | 1.38 (0.79–2.41) | 0.26            |

HR, hazard ratio. 95%CI, 95% confidence interval. ECOG PS, Eastern Cooperative Oncology Group performance status. ALC, absolute lymphocyte count. NLR, neutrophil-to-lymphocyte ratio. PLR, platelet-to-lymphocyte ratio. LMR, lymphocyte-to-monocyte ratio.

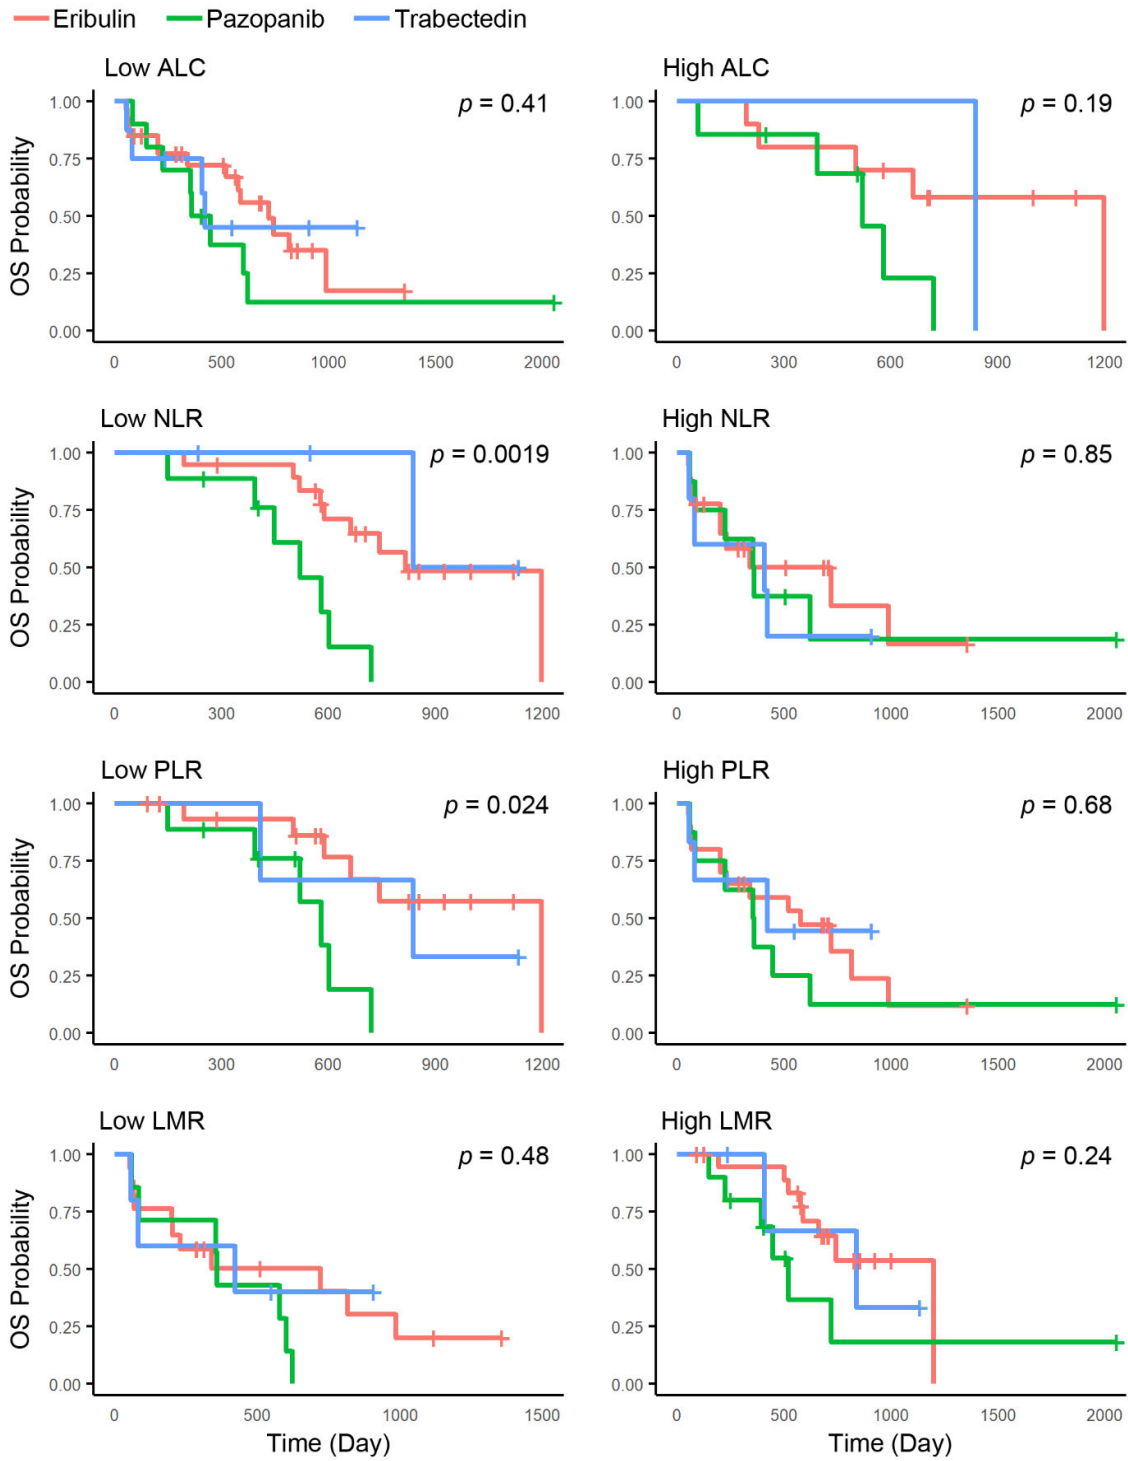

**Supplementary Figure S1.** Subgroup analyses of OS among the first administered drugs. There were significant differences among the first administered drugs in the low NLR subgroup and the low PLR subgroup. ALC, absolute lymphocyte count. NLR, neutrophil-to-lymphocyte ratio. PLR, platelet-to-lymphocyte ratio. LMR, lymphocyte-to-monocyte ratio.

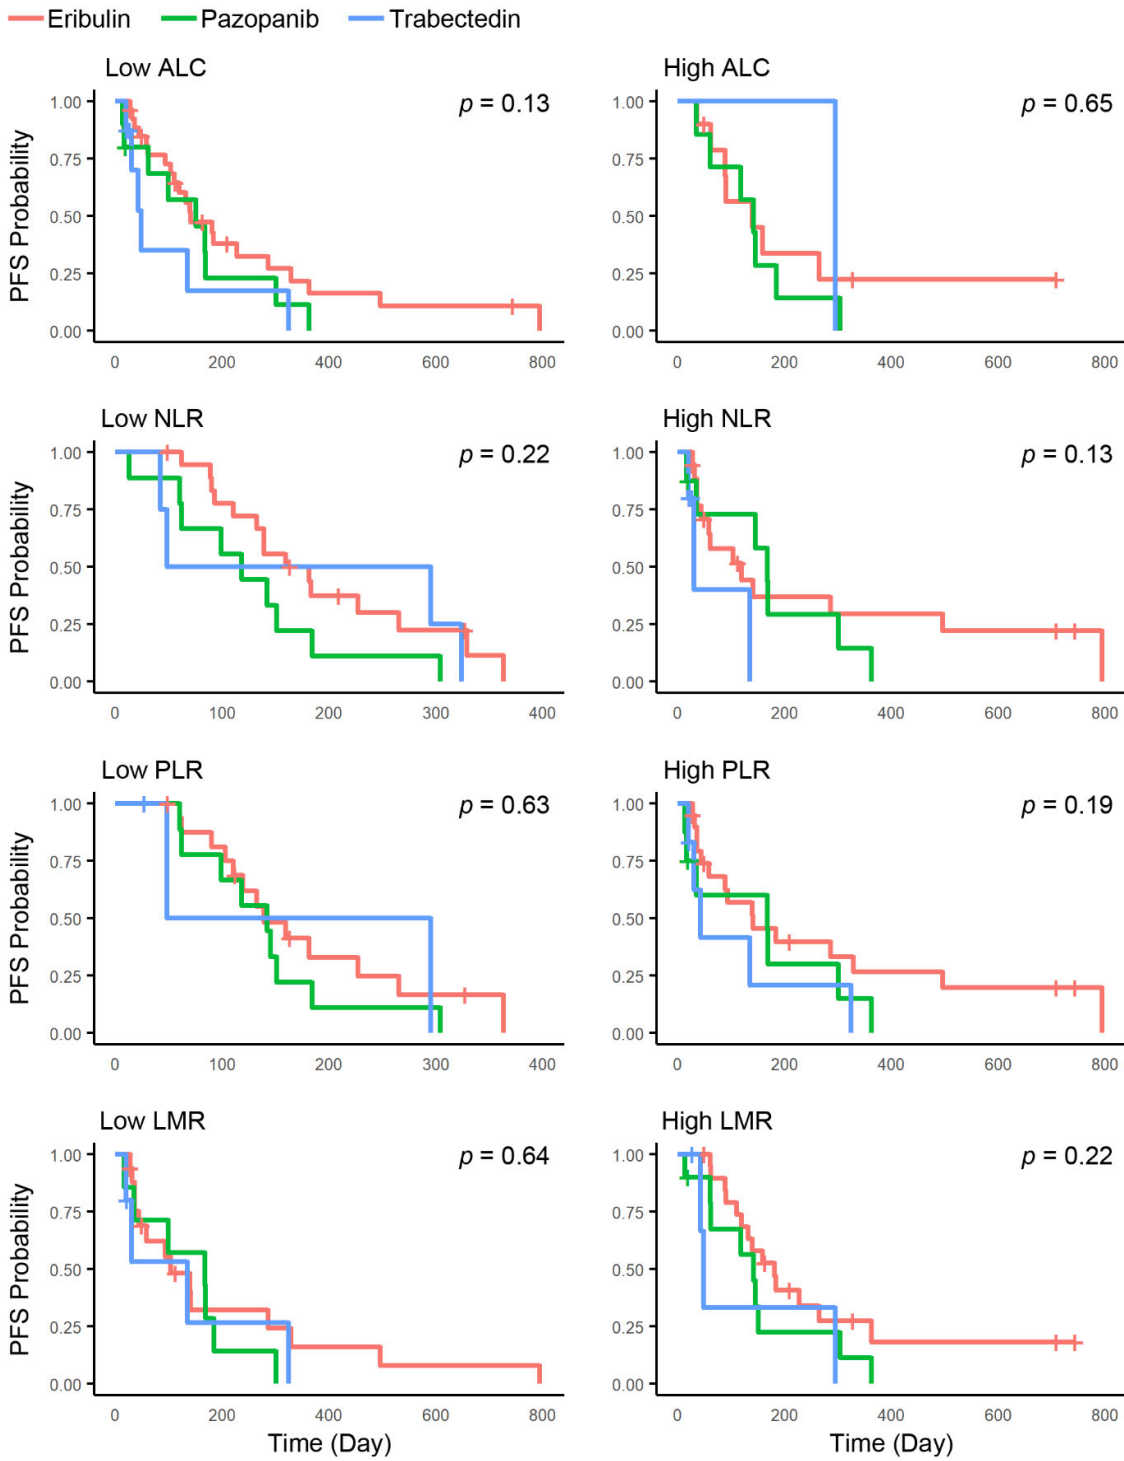

**Supplementary Figure S2.** Subgroup analyses of PFS among the first administered drugs. There were no significant differences among the first administered drugs in each subgroup. ALC, absolute lymphocyte count. NLR, neutrophil-to-lymphocyte ratio. PLR, platelet-to-lymphocyte ratio. LMR, lymphocyte-to-monocyte ratio.

**Supplementary Table S4. Hematological adverse events during the first course of each drug administration.**

|             |                  |      | ALC          |              |         | NLR          |             |         | PLR         |              |         | LMR          |              |         |
|-------------|------------------|------|--------------|--------------|---------|--------------|-------------|---------|-------------|--------------|---------|--------------|--------------|---------|
|             |                  |      | Low          | High         | p-value | Low          | High        | p-value | Low         | High         | p-value | Low          | High         | p-value |
| Eribulin    | Neutropenia      | none | 3 (11.1 %)   | 2 (20.0 %)   | 0.30    | 3 (15.8 %)   | 2 (11.1 %)  | 0.24    | 2 (11.8 %)  | 3 (15.0 %)   | 0.81    | 3 (17.6 %)   | 2 (10.0 %)   | 0.78    |
|             |                  | G1   | 4 (14.8 %)   | 2 (20.0 %)   |         | 1 (5.3 %)    | 5 (27.8 %)  |         | 2 (11.8 %)  | 4 (20.0 %)   |         | 3 (17.6 %)   | 3 (15.0 %)   |         |
|             |                  | G2   | 6 (22.2 %)   | 4 (40.0 %)   |         | 6 (31.6 %)   | 4 (22.2 %)  |         | 5 (29.4 %)  | 5 (25.0 %)   |         | 5 (29.4 %)   | 5 (25.0 %)   |         |
|             |                  | G3   | 6 (22.2 %)   | 2 (20.0 %)   |         | 3 (15.8 %)   | 5 (27.8 %)  |         | 5 (29.4 %)  | 3 (15.0 %)   |         | 4 (23.5 %)   | 4 (20.0 %)   |         |
|             |                  | G4   | 8 (29.6 %)   | 0 (0.0 %)    |         | 6 (31.6 %)   | 2 (11.1 %)  |         | 3 (17.6 %)  | 5 (25.0 %)   |         | 2 (11.8 %)   | 6 (30.0 %)   |         |
|             | Lymphopenia      | none | 8 (29.6 %)   | 8 (80.0 %)   | 0.049   | 10 (52.6 %)  | 6 (33.3 %)  | 0.18    | 12 (70.6 %) | 4 (20.0 %)   | 0.014   | 6 (35.3 %)   | 10 (50.0 %)  | 0.50    |
|             |                  | G1   | 9 (33.3 %)   | 2 (20.0 %)   |         | 6 (31.6 %)   | 5 (27.8 %)  |         | 2 (11.8 %)  | 9 (45.0 %)   |         | 6 (35.3 %)   | 5 (25.0 %)   |         |
|             |                  | G2   | 6 (22.2 %)   | 0 (0.0 %)    |         | 3 (15.8 %)   | 3 (16.7 %)  |         | 2 (11.8 %)  | 4 (20.0 %)   |         | 2 (11.8 %)   | 4 (20.0 %)   |         |
|             |                  | G3   | 4 (14.8 %)   | 0 (0.0 %)    |         | 0 (0.0 %)    | 4 (22.2 %)  |         | 1 (5.9 %)   | 3 (15.0 %)   |         | 3 (17.6 %)   | 1 (5.0 %)    |         |
|             |                  | G4   | 0 (0.0 %)    | 0 (0.0 %)    |         | 0 (0.0 %)    | 0 (0.0 %)   |         | 0 (0.0 %)   | 0 (0.0 %)    |         | 0 (0.0 %)    | 0 (0.0 %)    |         |
|             | Thrombocytopenia | none | 24 (88.9 %)  | 10 (100.0 %) | 1.00    | 17 (89.5 %)  | 17 (94.4 %) | 1.00    | 14 (82.4 %) | 20 (100.0 %) | 0.088   | 17 (100.0 %) | 17 (85.0 %)  | 0.49    |
|             |                  | G1   | 1 (3.7 %)    | 0 (0.0 %)    |         | 1 (5.3 %)    | 0 (0.0 %)   |         | 1 (5.9 %)   | 0 (0.0 %)    |         | 0 (0.0 %)    | 1 (5.0 %)    |         |
|             |                  | G2   | 2 (3.9 %)    | 0 (0.0 %)    |         | 1 (2.6 %)    | 1 (5.6 %)   |         | 2 (6.1 %)   | 0 (0.0 %)    |         | 0 (0.0 %)    | 2 (10.0 %)   |         |
|             |                  | G3   | 0 (0.0 %)    | 0 (0.0 %)    |         | 0 (0.0 %)    | 0 (0.0 %)   |         | 0 (0.0 %)   | 0 (0.0 %)    |         | 0 (0.0 %)    | 0 (0.0 %)    |         |
|             | FN               | none | 24 (88.9 %)  | 10 (100.0 %) | 0.55    | 19 (100.0 %) | 15 (83.3 %) | 0.11    | 16 (94.1 %) | 18 (90.0 %)  | 1.00    | 15 (88.2 %)  | 19 (95.0 %)  | 0.58    |
|             |                  | G3   | 3 (11.1 %)   | 0 (0.0 %)    |         | 0 (0.0 %)    | 3 (16.7 %)  |         | 1 (5.9 %)   | 2 (10.0 %)   |         | 2 (11.8 %)   | 1 (5.0 %)    |         |
| Pazopanib   | Neutropenia      | none | 4 (40.0 %)   | 5 (71.4 %)   | 0.55    | 5 (55.6 %)   | 4 (50.0 %)  | 1.00    | 5 (55.6 %)  | 4 (50.0 %)   | 1.00    | 3 (42.9 %)   | 6 (60.0 %)   | 0.81    |
|             |                  | G1   | 4 (40.0 %)   | 1 (14.3 %)   |         | 2 (22.2 %)   | 3 (37.5 %)  |         | 2 (22.2 %)  | 3 (37.5 %)   |         | 3 (42.9 %)   | 2 (20.0 %)   |         |
|             |                  | G2   | 2 (20.0 %)   | 1 (14.3 %)   |         | 2 (22.2 %)   | 1 (12.5 %)  |         | 2 (22.2 %)  | 1 (12.5 %)   |         | 1 (14.3 %)   | 2 (20.0 %)   |         |
|             |                  | G3   | 0 (0.0 %)    | 0 (0.0 %)    |         | 0 (0.0 %)    | 0 (0.0 %)   |         | 0 (0.0 %)   | 0 (0.0 %)    |         | 0 (0.0 %)    | 0 (0.0 %)    |         |
|             |                  | G4   | 0 (0.0 %)    | 0 (0.0 %)    |         | 0 (0.0 %)    | 0 (0.0 %)   |         | 0 (0.0 %)   | 0 (0.0 %)    |         | 0 (0.0 %)    | 0 (0.0 %)    |         |
|             | Lymphopenia      | none | 3 (30.0 %)   | 5 (71.4 %)   | 0.49    | 7 (77.8 %)   | 1 (12.5 %)  | 0.032   | 7 (77.8 %)  | 1 (12.5 %)   | 0.032   | 2 (28.6 %)   | 6 (60.0 %)   | 0.062   |
|             |                  | G1   | 3 (30.0 %)   | 1 (14.3 %)   |         | 1 (11.1 %)   | 3 (37.5 %)  |         | 1 (11.1 %)  | 3 (37.5 %)   |         | 3 (42.9 %)   | 1 (10.0 %)   |         |
|             |                  | G2   | 2 (20.0 %)   | 1 (14.3 %)   |         | 1 (11.1 %)   | 2 (25.0 %)  |         | 1 (11.1 %)  | 2 (25.0 %)   |         | 0 (0.0 %)    | 3 (30.0 %)   |         |
|             |                  | G3   | 2 (20.0 %)   | 0 (0.0 %)    |         | 0 (0.0 %)    | 2 (25.0 %)  |         | 0 (0.0 %)   | 2 (25.0 %)   |         | 2 (28.6 %)   | 0 (0.0 %)    |         |
|             |                  | G4   | 0 (0.0 %)    | 0 (0.0 %)    |         | 0 (0.0 %)    | 0 (0.0 %)   |         | 0 (0.0 %)   | 0 (0.0 %)    |         | 0 (0.0 %)    | 0 (0.0 %)    |         |
|             | Thrombocytopenia | none | 6 (60.0 %)   | 4 (57.1 %)   | 1.00    | 4 (44.4 %)   | 6 (75.0 %)  | 0.46    | 4 (44.4 %)  | 6 (75.0 %)   | 0.46    | 5 (71.4 %)   | 5 (50.0 %)   | 0.78    |
|             |                  | G1   | 3 (30.0 %)   | 3 (42.9 %)   |         | 4 (44.4 %)   | 2 (25.0 %)  |         | 4 (44.4 %)  | 2 (25.0 %)   |         | 2 (28.6 %)   | 4 (40.0 %)   |         |
|             |                  | G2   | 0 (0.0 %)    | 0 (0.0 %)    |         | 0 (0.0 %)    | 0 (0.0 %)   |         | 0 (0.0 %)   | 0 (0.0 %)    |         | 0 (0.0 %)    | 0 (0.0 %)    |         |
|             |                  | G3   | 1 (10.0 %)   | 0 (0.0 %)    |         | 1 (11.1 %)   | 0 (0.0 %)   |         | 1 (11.1 %)  | 0 (0.0 %)    |         | 0 (0.0 %)    | 1 (10.0 %)   |         |
|             | FN               | none | 10 (100.0 %) | 7 (100.0 %)  | 1.00    | 9 (100.0 %)  | 8 (100.0 %) | 1.00    | 9 (100.0 %) | 8 (100.0 %)  | 1.00    | 7 (100.0 %)  | 10 (100.0 %) | 1.00    |
|             |                  | G3   | 0 (0.0 %)    | 0 (0.0 %)    |         | 0 (0.0 %)    | 0 (0.0 %)   |         | 0 (0.0 %)   | 0 (0.0 %)    |         | 0 (0.0 %)    | 0 (0.0 %)    |         |
| Trabectedin | Neutropenia      | none | 5 (62.5 %)   | 0 (0.0 %)    | 0.44    | 1 (25.0 %)   | 4 (80.0 %)  | 0.37    | 1 (33.3 %)  | 4 (66.7 %)   | 1.00    | 4 (80.0 %)   | 1 (25.0 %)   | 0.37    |
|             |                  | G1   | 1 (12.5 %)   | 1 (100.0 %)  |         | 1 (25.0 %)   | 1 (20.0 %)  |         | 1 (33.3 %)  | 1 (16.7 %)   |         | 1 (20.0 %)   | 1 (25.0 %)   |         |
|             |                  | G2   | 2 (25.0 %)   | 0 (0.0 %)    |         | 2 (50.0 %)   | 0 (0.0 %)   |         | 1 (33.3 %)  | 1 (16.7 %)   |         | 0 (0.0 %)    | 2 (50.0 %)   |         |
|             |                  | G3   | 0 (0.0 %)    | 0 (0.0 %)    |         | 0 (0.0 %)    | 0 (0.0 %)   |         | 0 (0.0 %)   | 0 (0.0 %)    |         | 0 (0.0 %)    | 0 (0.0 %)    |         |
|             |                  | G4   | 0 (0.0 %)    | 0 (0.0 %)    |         | 0 (0.0 %)    | 0 (0.0 %)   |         | 0 (0.0 %)   | 0 (0.0 %)    |         | 0 (0.0 %)    | 0 (0.0 %)    |         |
|             | Lymphopenia      | none | 1 (12.5 %)   | 0 (0.0 %)    | 0.33    | 1 (25.0 %)   | 0 (0.0 %)   | 0.71    | 0 (0.0 %)   | 1 (16.7 %)   | 0.57    | 1 (20.0 %)   | 0 (0.0 %)    | 1.00    |
|             |                  | G1   | 2 (25.0 %)   | 0 (0.0 %)    |         | 1 (25.0 %)   | 1 (20.0 %)  |         | 0 (0.0 %)   | 2 (33.3 %)   |         | 1 (20.0 %)   | 1 (25.0 %)   |         |
|             |                  | G2   | 4 (50.0 %)   | 0 (0.0 %)    |         | 1 (25.0 %)   | 3 (60.0 %)  |         | 2 (66.7 %)  | 2 (33.3 %)   |         | 2 (40.0 %)   | 2 (50.0 %)   |         |
|             |                  | G3   | 0 (0.0 %)    | 1 (100.0 %)  |         | 1 (25.0 %)   | 0 (0.0 %)   |         | 1 (33.3 %)  | 0 (0.0 %)    |         | 0 (0.0 %)    | 1 (25.0 %)   |         |
|             |                  | G4   | 1 (12.5 %)   | 0 (0.0 %)    |         | 0 (0.0 %)    | 1 (20.0 %)  |         | 0 (0.0 %)   | 1 (16.7 %)   |         | 1 (20.0 %)   | 0 (0.0 %)    |         |
|             | Thrombocytopenia | none | 7 (87.5 %)   | 0 (0.0 %)    | 0.22    | 2 (50.0 %)   | 5 (100.0 %) | 0.17    | 1 (33.3 %)  | 6 (100.0 %)  | 0.083   | 5 (100.0 %)  | 2 (50.0 %)   | 0.17    |
|             |                  | G1   | 1 (12.5 %)   | 1 (100.0 %)  |         | 2 (50.0 %)   | 0 (0.0 %)   |         | 2 (66.7 %)  | 0 (0.0 %)    |         | 0 (0.0 %)    | 2 (50.0 %)   |         |
|             |                  | G2   | 0 (0.0 %)    | 0 (0.0 %)    |         | 0 (0.0 %)    | 0 (0.0 %)   |         | 0 (0.0 %)   | 0 (0.0 %)    |         | 0 (0.0 %)    | 0 (0.0 %)    |         |
|             |                  | G3   | 0 (0.0 %)    | 0 (0.0 %)    |         | 0 (0.0 %)    | 0 (0.0 %)   |         | 0 (0.0 %)   | 0 (0.0 %)    |         | 0 (0.0 %)    | 0 (0.0 %)    |         |
|             | FN               | none | 8 (100.0 %)  | 1 (100.0 %)  | 1.00    | 4 (100.0 %)  | 5 (100.0 %) | 1.00    | 3 (100.0 %) | 6 (100.0 %)  | 1.00    | 5 (100.0 %)  | 4 (100.0 %)  | 1.00    |
|             |                  | G3   | 0 (0.0 %)    | 0 (0.0 %)    |         | 0 (0.0 %)    | 0 (0.0 %)   |         | 0 (0.0 %)   | 0 (0.0 %)    |         | 0 (0.0 %)    | 0 (0.0 %)    |         |

ALC, absolute lymphocyte count. NLR, neutrophil-to-lymphocyte ratio. PLR, platelet-to-lymphocyte ratio. LMR, lymphocyte-to-monocyte ratio. FN, febrile neutropenia.
